# Supplementary material
Source: ML conference proceedings conference paper supplement (https://proceedings.mlr.press/v89/sahu19a.html)
Supplement: Supplementary file [file sahu19a-supp.pdf]

## A Proofs of Deterministic Frank-Wolfe

**Lemma A.1.** *Consider the proposed zeroth order Frank Wolfe Algorithm. Let Assumptions A1-A5 hold. Then, the sub-optimality  $F(\mathbf{x}_{t+1}) - F(\mathbf{x}^*)$  satisfies*

$$\begin{aligned} F(\mathbf{x}_{t+1}) - F(\mathbf{x}^*) &\leq (1 - \gamma_{t+1})(F(\mathbf{x}_t) - F(\mathbf{x}^*)) \\ &\quad + \gamma_{t+1}R\|\nabla F(\mathbf{x}_t) - \mathbf{d}_t\| + \frac{LR^2\gamma_{t+1}^2}{2}. \end{aligned} \quad (28)$$

*Proof.* The  $L$ -smoothness of the function  $f$  yields the following upper bound on  $f(\mathbf{x}_{t+1})$ :

$$\begin{aligned} f(\mathbf{x}_{t+1}) &\leq f(\mathbf{x}_t) + \nabla f(\mathbf{x}_t)^T(\mathbf{x}_{t+1} - \mathbf{x}_t) + \frac{L}{2}\|\mathbf{x}_{t+1} - \mathbf{x}_t\|^2 \\ &= f(\mathbf{x}_t) + \gamma_{t+1}(\nabla f(\mathbf{x}_t) - \mathbf{d}_t)^T(\mathbf{v}_t - \mathbf{x}_t) + \gamma_{t+1}\mathbf{d}_t^T(\mathbf{v}_t - \mathbf{x}_t) \\ &\quad + \frac{L\gamma_{t+1}^2}{2}\|\mathbf{v}_t - \mathbf{x}_t\|^2 \end{aligned} \quad (29)$$

Since  $\langle \mathbf{x}^*, \mathbf{d}_t \rangle \geq \min_{v \in \mathcal{C}} \{\langle \mathbf{v}, \mathbf{d}_t \rangle\} = \langle \mathbf{v}_t, \mathbf{d}_t \rangle$ , we have,

$$\begin{aligned} f(\mathbf{x}_{t+1}) &\leq f(\mathbf{x}_t) + \gamma_{t+1}(\nabla f(\mathbf{x}_t) - \mathbf{d}_t)^T(\mathbf{v}_t - \mathbf{x}_t) \\ &\quad + \gamma_{t+1}\mathbf{d}_t^T(\mathbf{x}^* - \mathbf{x}_t) + \frac{L\gamma_{t+1}^2}{2}\|\mathbf{v}_t - \mathbf{x}_t\|^2 \\ &\leq f(\mathbf{x}_t) + \gamma_{t+1}(\nabla f(\mathbf{x}_t) - \mathbf{d}_t)^T(\mathbf{v}_t - \mathbf{x}^*) \\ &\quad + \gamma_{t+1}\nabla f(\mathbf{x}_t)^T(\mathbf{x}^* - \mathbf{x}_t) + \frac{LR\gamma_{t+1}^2}{2}\|\mathbf{v}_t - \mathbf{x}_t\|^2. \end{aligned} \quad (30)$$

Using Cauchy-Schwarz inequality, we have,

$$\begin{aligned} f(\mathbf{x}_{t+1}) &\leq f(\mathbf{x}_t) + \gamma_{t+1}\|\nabla f(\mathbf{x}_t) - \mathbf{d}_t\|\|\mathbf{v}_t - \mathbf{x}^*\| \\ &\quad - \gamma_{t+1}(f(\mathbf{x}_t) - f(\mathbf{x}^*)) + \frac{L\gamma_{t+1}^2}{2}\|\mathbf{v}_t - \mathbf{x}^*\|^2 \\ &\leq f(\mathbf{x}_t) + \gamma_{t+1}R\|\nabla f(\mathbf{x}_t) - \mathbf{d}_t\| - \gamma_{t+1}(f(\mathbf{x}_t) - f(\mathbf{x}^*)) \\ &\quad + \frac{LR^2\gamma_{t+1}^2}{2}, \end{aligned} \quad (31)$$

and subtracting  $f(\mathbf{x}^*)$  from both sides of (31), we have,

$$\begin{aligned} f(\mathbf{x}_{t+1}) - f(\mathbf{x}^*) &\leq (1 - \gamma_{t+1})(f(\mathbf{x}_t) - f(\mathbf{x}^*)) \\ &\quad + \gamma_{t+1}R\|\nabla f(\mathbf{x}_t) - \mathbf{d}_t\| + \frac{LR^2\gamma_{t+1}^2}{2}. \end{aligned} \quad (32)$$

□

*Proof of Theorem 3.1.* We have, from Lemma A.1,

$$\begin{aligned} F(\mathbf{x}_{t+1}) - F(\mathbf{x}^*) &\leq (1 - \gamma_{t+1})(F(\mathbf{x}_t) - F(\mathbf{x}^*)) \\ &\quad + \gamma_{t+1}R\|\nabla F(\mathbf{x}_t) - \mathbf{g}(\mathbf{x}_t)\| + \frac{LR^2\gamma_{t+1}^2}{2} \\ &\Rightarrow F(\mathbf{x}_{t+1}) - F(\mathbf{x}^*) \leq (1 - \gamma_{t+1})(F(\mathbf{x}_t) - F(\mathbf{x}^*)) \\ &\quad + \frac{c_{t+1}d}{2}\gamma_{t+1}R^2 + \frac{LR^2\gamma_{t+1}^2}{2}. \end{aligned} \quad (33)$$

From, (33), we have,

$$F(\mathbf{x}_{t+1}) - F(\mathbf{x}^*) \leq (1 - \gamma_{t+1})(F(\mathbf{x}_t) - F(\mathbf{x}^*)) + LR^2\gamma_{t+1}^2. \quad (34)$$

We use Lemma B.1 to derive the primal gap which then yields,

$$F(\mathbf{x}_t) - F(\mathbf{x}^*) = \frac{Q_{ns}}{t+2}, \quad (35)$$

where  $Q_{ns} = \max\{2(F(\mathbf{x}_0) - F(\mathbf{x}^*)), 4LR^2\}$ .

□

## B Proofs of Zeroth Order Stochastic Frank Wolfe: RDSA

*Proof of Lemma 3.2 (1).* Use the definition  $\mathbf{d}_t := (1 - \rho_t)\mathbf{d}_{t-1} + \rho_t g(\mathbf{x}_t; \mathbf{y}_t, \mathbf{z}_t)$  to write the difference  $\|\nabla f(\mathbf{x}_t) - \mathbf{d}_t\|^2$  as

$$\begin{aligned} \|\nabla f(\mathbf{x}_t) - \mathbf{d}_t\|^2 &= \|\nabla f(\mathbf{x}_t) - (1 - \rho_t)\mathbf{d}_{t-1} \\ &\quad - \rho_t g(\mathbf{x}_t; \mathbf{y}_t, \mathbf{z}_t)\|^2. \end{aligned} \quad (36)$$

Add and subtract the term  $(1 - \rho_t)\nabla f(\mathbf{x}_{t-1})$  to the right hand side of (36), regroup the terms and expand the squared term to obtain

$$\begin{aligned} &\|\nabla f(\mathbf{x}_t) - \mathbf{d}_t\|^2 \\ &= \|\nabla f(\mathbf{x}_t) - (1 - \rho_t)\nabla f(\mathbf{x}_{t-1}) + (1 - \rho_t)\nabla f(\mathbf{x}_{t-1}) \\ &\quad - (1 - \rho_t)\mathbf{d}_{t-1} - \rho_t g(\mathbf{x}_t; \mathbf{y}_t, \mathbf{z}_t)\|^2 \\ &= \rho_t^2 \|\nabla f(\mathbf{x}_t) - g(\mathbf{x}_t; \mathbf{y}_t, \mathbf{z}_t)\|^2 + (1 - \rho_t)^2 \|\nabla f(\mathbf{x}_{t-1}) - \mathbf{d}_{t-1}\|^2 \\ &\quad + (1 - \rho_t)^2 \|\nabla f(\mathbf{x}_t) - \nabla f(\mathbf{x}_{t-1})\|^2 \\ &\quad + 2\rho_t(1 - \rho_t)(\nabla f(\mathbf{x}_t) - g(\mathbf{x}_t; \mathbf{y}_t, \mathbf{z}_t))^T (\nabla f(\mathbf{x}_t) - \nabla f(\mathbf{x}_{t-1})) \\ &\quad + 2\rho_t(1 - \rho_t)(\nabla f(\mathbf{x}_t) - g(\mathbf{x}_t; \mathbf{y}_t, \mathbf{z}_t))^T (\nabla f(\mathbf{x}_{t-1}) - \mathbf{d}_{t-1}) \\ &\quad + 2(1 - \rho_t)^2 (\nabla f(\mathbf{x}_t) - \nabla f(\mathbf{x}_{t-1}))^T (\nabla f(\mathbf{x}_{t-1}) - \mathbf{d}_{t-1}). \end{aligned} \quad (37)$$

Compute the expectation  $\mathbb{E}[\cdot | \mathcal{F}_t]$  for both sides of (37), where  $\mathcal{F}_t$  is the  $\sigma$ -algebra given by  $\{\{\mathbf{y}_s\}_{s=0}^{t-1}, \{\mathbf{z}_s\}_{s=0}^{t-1}\}$  to obtain

$$\begin{aligned} &\mathbb{E}[\|\nabla f(\mathbf{x}_t) - \mathbf{d}_t\|^2 | \mathcal{F}_t] \\ &= \rho_t^2 \mathbb{E}[\|\nabla f(\mathbf{x}_t) - g(\mathbf{x}_t; \mathbf{y}_t, \mathbf{z}_t)\|^2 | \mathcal{F}_t] \\ &\quad + (1 - \rho_t)^2 \|\nabla f(\mathbf{x}_t) - \nabla f(\mathbf{x}_{t-1})\|^2 \\ &\quad + (1 - \rho_t)^2 \|\nabla f(\mathbf{x}_{t-1}) - \mathbf{d}_{t-1}\|^2 \\ &\quad + 2(1 - \rho_t)^2 (\nabla f(\mathbf{x}_t) - \nabla f(\mathbf{x}_{t-1}))^T (\nabla f(\mathbf{x}_{t-1}) - \mathbf{d}_{t-1}) \\ &\quad + 2\rho_t(1 - \rho_t) \mathbb{E}[(\nabla f(\mathbf{x}_t) - g(\mathbf{x}_t; \mathbf{y}_t, \mathbf{z}_t))^T (\nabla f(\mathbf{x}_t) - \nabla f(\mathbf{x}_{t-1})) | \mathcal{F}_t] \\ &\quad + 2\rho_t(1 - \rho_t) \mathbb{E}[(\nabla f(\mathbf{x}_t) - g(\mathbf{x}_t; \mathbf{y}_t, \mathbf{z}_t))^T (\nabla f(\mathbf{x}_{t-1}) - \mathbf{d}_{t-1}) | \mathcal{F}_t] \\ &\leq \rho_t^2 \mathbb{E}[\|\nabla f(\mathbf{x}_t) - g(\mathbf{x}_t; \mathbf{y}_t, \mathbf{z}_t)\|^2 | \mathcal{F}_t] \\ &\quad + (1 - \rho_t)^2 \|\nabla f(\mathbf{x}_t) - \nabla f(\mathbf{x}_{t-1})\|^2 \\ &\quad + (1 - \rho_t)^2 \|\nabla f(\mathbf{x}_{t-1}) - \mathbf{d}_{t-1}\|^2 \\ &\quad + (1 - \rho_t)^2 \beta_t \|\nabla f(\mathbf{x}_{t-1}) - \mathbf{d}_{t-1}\|^2 + \frac{(1 - \rho_t)^2}{\beta_t} \|\nabla f(\mathbf{x}_t) - \nabla f(\mathbf{x}_{t-1})\|^2 \\ &\quad + 2\rho_t(1 - \rho_t)(c_t L \mathbf{v}(\mathbf{x}, c_t))^T (\nabla f(\mathbf{x}_t) - \nabla f(\mathbf{x}_{t-1})) \\ &\quad + 2\rho_t(1 - \rho_t)(c_t L \mathbf{v}(\mathbf{x}, c_t))^T (\nabla f(\mathbf{x}_{t-1}) - \mathbf{d}_{t-1}) \\ &\leq \rho_t^2 \mathbb{E}[\|\nabla f(\mathbf{x}_t) - g(\mathbf{x}_t; \mathbf{y}_t, \mathbf{z}_t)\|^2 | \mathcal{F}_t] \\ &\quad + (1 - \rho_t)^2 \|\nabla f(\mathbf{x}_t) - \nabla f(\mathbf{x}_{t-1})\|^2 \\ &\quad + (1 - \rho_t)^2 \|\nabla f(\mathbf{x}_{t-1}) - \mathbf{d}_{t-1}\|^2 \\ &\quad + (1 - \rho_t)^2 \beta_t \|\nabla f(\mathbf{x}_{t-1}) - \mathbf{d}_{t-1}\|^2 + \frac{(1 - \rho_t)^2}{\beta_t} \|\nabla f(\mathbf{x}_t) - \nabla f(\mathbf{x}_{t-1})\|^2 \\ &\quad + 2\rho_t(1 - \rho_t)c_t^2 \|L \mathbf{v}(\mathbf{x}, c_t)\|^2 + \rho_t(1 - \rho_t) \|\nabla f(\mathbf{x}_t) - \nabla f(\mathbf{x}_{t-1})\|^2 \\ &\quad + \rho_t(1 - \rho_t) \|\nabla f(\mathbf{x}_{t-1}) - \mathbf{d}_{t-1}\|^2 \\ &\Rightarrow \mathbb{E}[\|\nabla f(\mathbf{x}_t) - \mathbf{d}_t\|^2] \\ &\leq \rho_t^2 \mathbb{E}[\|\nabla f(\mathbf{x}_t) - \nabla F(\mathbf{x}_t, \mathbf{y}_t) + \nabla F(\mathbf{x}_t, \mathbf{y}_t) - g(\mathbf{x}_t; \mathbf{y}_t, \mathbf{z}_t)\|^2] \\ &\quad + (1 - \rho_t)^2 \mathbb{E}[\|\nabla f(\mathbf{x}_t) - \nabla f(\mathbf{x}_{t-1})\|^2] \\ &\quad + (1 - \rho_t)^2 \mathbb{E}[\|\nabla f(\mathbf{x}_{t-1}) - \mathbf{d}_{t-1}\|^2] \end{aligned}$$

$$\begin{aligned}
 & + (1 - \rho_t)^2 \beta_t \mathbb{E} [\|\nabla f(\mathbf{x}_{t-1}) - \mathbf{d}_{t-1}\|^2] \\
 & + \frac{(1 - \rho_t)^2}{\beta_t} \mathbb{E} [\|\nabla f(\mathbf{x}_t) - \nabla f(\mathbf{x}_{t-1})\|^2] \\
 & + \frac{\rho_t}{4} (1 - \rho_t) c_t^2 L^2 M(\mu) + \rho_t (1 - \rho_t) \mathbb{E} [\|\nabla f(\mathbf{x}_t) - \nabla f(\mathbf{x}_{t-1})\|^2] \\
 & + \rho_t (1 - \rho_t) \mathbb{E} [\|\nabla f(\mathbf{x}_{t-1}) - \mathbf{d}_{t-1}\|^2] \\
 & \leq 2\rho_t^2 \mathbb{E} [\|\nabla f(\mathbf{x}_t) - \nabla F(\mathbf{x}_t, \mathbf{y}_t)\|^2] \\
 & + 2\rho_t^2 \mathbb{E} [\|\nabla F(\mathbf{x}_t, \mathbf{y}_t) - g(\mathbf{x}_t; \mathbf{y}_t, \mathbf{z}_t)\|^2] \\
 & + \left(1 - \rho_t + \frac{(1 - \rho_t)^2}{\beta_t}\right) \mathbb{E} [\|\nabla f(\mathbf{x}_t) - \nabla f(\mathbf{x}_{t-1})\|^2] \\
 & + (1 - \rho_t + (1 - \rho_t)^2 \beta_t) \mathbb{E} [\|\nabla f(\mathbf{x}_{t-1}) - \mathbf{d}_{t-1}\|^2] \\
 & + \frac{\rho_t}{2} (1 - \rho_t) c_t^2 L^2 M(\mu) \\
 & \leq 2\rho_t^2 \sigma^2 + 4\rho_t^2 \mathbb{E} [\|\nabla F(\mathbf{x}_t, \mathbf{y}_t)\|^2] + 4\rho_t^2 \mathbb{E} [\|g(\mathbf{x}_t; \mathbf{y}_t, \mathbf{z}_t)\|^2] \\
 & + \left(1 - \rho_t + \frac{(1 - \rho_t)^2}{\beta_t}\right) \mathbb{E} [\|\nabla f(\mathbf{x}_t) - \nabla f(\mathbf{x}_{t-1})\|^2] \\
 & + (1 - \rho_t + (1 - \rho_t)^2 \beta_t) \mathbb{E} [\|\nabla f(\mathbf{x}_{t-1}) - \mathbf{d}_{t-1}\|^2] \\
 & + \frac{\rho_t}{2} (1 - \rho_t) c_t^2 L^2 M(\mu) \\
 & \leq 2\rho_t^2 \sigma^2 + 4\rho_t^2 L_1^2 + 8\rho_t^2 s(d) L_1^2 + 2\rho_t^2 c_t^2 L^2 M(\mu) \\
 & + \left(1 - \rho_t + \frac{(1 - \rho_t)^2}{\beta_t}\right) \mathbb{E} [\|\nabla f(\mathbf{x}_t) - \nabla f(\mathbf{x}_{t-1})\|^2] \\
 & + (1 - \rho_t + (1 - \rho_t)^2 \beta_t) \mathbb{E} [\|\nabla f(\mathbf{x}_{t-1}) - \mathbf{d}_{t-1}\|^2] \\
 & + \frac{\rho_t}{2} c_t^2 L^2 M(\mu), \tag{38}
 \end{aligned}$$

where we used the gradient approximation bounds as stated in (15) and used Young's inequality to substitute the inner products and in particular substituted  $2\langle \nabla f(\mathbf{x}_t) - \nabla f(\mathbf{x}_{t-1}), \nabla f(\mathbf{x}_{t-1}) - \mathbf{d}_{t-1} \rangle$  by the upper bound  $\beta_t \|\nabla f(\mathbf{x}_{t-1}) - \mathbf{d}_{t-1}\|^2 + (1/\beta_t) \|\nabla f(\mathbf{x}_t) - \nabla f(\mathbf{x}_{t-1})\|^2$  where  $\beta_t > 0$  is a free parameter.

By assumption A4, the norm  $\|\nabla f(\mathbf{x}_t) - \nabla f(\mathbf{x}_{t-1})\|$  is bounded above by  $L\|\mathbf{x}_t - \mathbf{x}_{t-1}\|$ . In addition, the condition in Assumption A1 implies that  $L\|\mathbf{x}_t - \mathbf{x}_{t-1}\| = L\gamma_t \|\mathbf{v}_t - \mathbf{x}_t\| \leq \gamma_t LR$ . Therefore, we can replace  $\|\nabla f(\mathbf{x}_t) - \nabla f(\mathbf{x}_{t-1})\|$  by its upper bound  $\gamma_t LR$  and since we assume that  $\rho_t \leq 1$  we can replace all the terms  $(1 - \rho_t)^2$ . Furthermore, using  $\beta_t := \rho_t/2$  we have,

$$\begin{aligned}
 & \mathbb{E} [\|\nabla f(\mathbf{x}_t) - \mathbf{d}_t\|^2] \\
 & \leq 2\rho_t^2 \sigma^2 + 4\rho_t^2 L_1^2 + 8\rho_t^2 s(d) L_1^2 + 2\rho_t^2 c_t^2 L^2 M(\mu) \\
 & + \gamma_t^2 (1 - \rho_t) \left(1 + \frac{2}{\rho_t}\right) L^2 R^2 + \frac{\rho_t}{2} c_t^2 L^2 M(\mu) \\
 & + (1 - \rho_t) \left(1 + \frac{\rho_t}{2}\right) \mathbb{E} [\|\nabla f(\mathbf{x}_{t-1}) - \mathbf{d}_{t-1}\|^2]. \tag{39}
 \end{aligned}$$

Now using the inequalities  $(1 - \rho_t)(1 + (2/\rho_t)) \leq (2/\rho_t)$  and  $(1 - \rho_t)(1 + (\rho_t/2)) \leq (1 - \rho/2)$  we obtain

$$\begin{aligned}
 & \mathbb{E} [\|\nabla f(\mathbf{x}_t) - \mathbf{d}_t\|^2] \leq 2\rho_t^2 \sigma^2 + 4\rho_t^2 L_1^2 \\
 & + 8\rho_t^2 s(d) L_1^2 + 2\rho_t^2 c_t^2 L^2 M(\mu) \\
 & + \frac{2L^2 R^2 \gamma_t^2}{\rho_t} + \frac{\rho_t}{2} c_t^2 L^2 M(\mu) \\
 & + \left(1 - \frac{\rho_t}{2}\right) \mathbb{E} [\|\nabla f(\mathbf{x}_{t-1}) - \mathbf{d}_{t-1}\|^2]. \tag{40}
 \end{aligned}$$

□

Then, we have, from Lemma A.1

$$\mathbb{E} [f(\mathbf{x}_{t+1}) - f(\mathbf{x}^*)] \leq (1 - \gamma_{t+1}) \mathbb{E} [(f(\mathbf{x}_t) - f(\mathbf{x}^*))].$$

$$+ \gamma_{t+1} R \mathbb{E} [\|\nabla f(\mathbf{x}_t) - \mathbf{d}_t\|] + \frac{LR^2\gamma_{t+1}^2}{2}, \quad (41)$$

and then by using Jensen's inequality, we obtain,

$$\begin{aligned} \mathbb{E} [f(\mathbf{x}_{t+1}) - f(\mathbf{x}^*)] &\leq (1 - \gamma_{t+1}) \mathbb{E} [(f(\mathbf{x}_t) - f(\mathbf{x}^*))] \\ &+ \gamma_{t+1} R \sqrt{\mathbb{E} [\|\nabla f(\mathbf{x}_t) - \mathbf{d}_t\|^2]} + \frac{LR^2\gamma_{t+1}^2}{2}. \end{aligned} \quad (42)$$

We state a Lemma next which will be crucial for the rest of the paper.

**Lemma B.1.** *Let  $z(k)$  be a non-negative (deterministic) sequence satisfying:*

$$z(k+1) \leq (1 - r_1(k)) z_1(k) + r_2(k),$$

where  $\{r_1(k)\}$  and  $\{r_2(k)\}$  are deterministic sequences with

$$\frac{a_1}{(k+1)^{\delta_1}} \leq r_1(k) \leq 1 \quad \text{and} \quad r_2(k) \leq \frac{a_2}{(k+1)^{2\delta_1}},$$

with  $a_1 > 0$ ,  $a_2 > 0$ ,  $1 > \delta_1 > 1/2$  and  $k_0 \geq 1$ . Then,

$$z(k+1) \leq \exp\left(-\frac{a_1\delta_1(k+k_0)^{1-\delta_1}}{4(1-\delta_1)}\right) \left(z(0) + \frac{a_2}{k_0^{\delta_1}(2\delta_1-1)}\right) + \frac{a_2 2^{\delta_1}}{a_1(k+k_0)^{\delta_1}}.$$

*Proof of Lemma B.1.* We have,

$$\begin{aligned} z(k+1) &\leq \prod_{l=0}^k \left(1 - \frac{a_1}{(l+k_0)^{\delta_1}}\right) z(0) \sum_{l=0}^{\lfloor \frac{k}{2} \rfloor - 1} \prod_{m=l+1}^k \left(1 - \frac{a_1}{(m+k_0)^{\delta_1}}\right) \frac{a_2}{(k+k_0)^{2\delta_1}} \\ &+ \sum_{l=\lfloor \frac{k}{2} \rfloor}^k \prod_{m=l+1}^k \left(1 - \frac{a_1}{(m+k_0)^{\delta_1}}\right) \frac{a_2}{(k+k_0)^{2\delta_1}} \\ &\leq \exp\left(\sum_{l=0}^k \left(1 - \frac{a_1}{(l+k_0)^{\delta_1}}\right)\right) z(0) + \prod_{m=l+1}^k \left(1 - \frac{a_1}{(m+k_0)^{\delta_1}}\right) \sum_{l=0}^{\lfloor \frac{k}{2} \rfloor - 1} \frac{a_2}{(k+k_0)^{2\delta_1}} \\ &+ \frac{a_2 2^{\delta_1}}{a_1(k+k_0)^{\delta_1}} \sum_{l=\lfloor \frac{k}{2} \rfloor}^k \prod_{m=l+1}^k \left(1 - \frac{a_1}{(m+k_0)^{\delta_1}}\right) \frac{a_1}{(k+k_0)^{\delta_1}} \\ &\leq \exp\left(-\sum_{l=0}^k \frac{a_1}{(l+k_0)^{\delta_1}}\right) z(0) + \frac{a_2}{a_1 k_0^{\delta_1}} \exp\left(-\sum_{m=\lfloor \frac{k}{2} \rfloor}^k \frac{a_1}{(m+k_0)^{\delta_1}}\right) \sum_{l=0}^{\lfloor \frac{k}{2} \rfloor - 1} \frac{a_1}{(k+k_0)^{2\delta_1}} \\ &+ \frac{a_2 2^{\delta_1}}{a_1(k+k_0)^{\delta_1}} \sum_{l=\lfloor \frac{k}{2} \rfloor}^k \left(\prod_{m=l+1}^k \left(1 - \frac{a_1}{(m+k_0)^{\delta_1}}\right) - \prod_{m=l}^k \left(1 - \frac{a_1}{(m+k_0)^{\delta_1}}\right)\right) \\ &\leq \exp\left(-\sum_{l=0}^k \frac{a_1}{(l+k_0)^{\delta_1}}\right) z(0) + \frac{a_2 2^{\delta_1}}{a_1(k+k_0)^{\delta_1}} + \frac{a_2}{a_1 k_0^{\delta_1}} \exp\left(-\sum_{m=\lfloor \frac{k}{2} \rfloor}^k \frac{a_1}{(m+k_0)^{\delta_1}}\right) \sum_{l=0}^{\lfloor \frac{k}{2} \rfloor - 1} \frac{a_1}{(k+k_0)^{2\delta_1}} \\ &\leq \exp\left(-\sum_{l=0}^k \frac{a_1}{(l+k_0)^{\delta_1}}\right) z(0) + \frac{a_2 2^{\delta_1}}{a_1(k+k_0)^{\delta_1}} + \frac{a_2}{k_0^{\delta_1}} \exp\left(-\frac{a_1\delta_1}{4(1-\delta_1)}(k+k_0)^{1-\delta_1}\right) \frac{1}{2\delta_1-1}, \end{aligned} \quad (43)$$

where we used the inequality that,

$$\sum_{m=\lfloor \frac{k}{2} \rfloor}^k \frac{1}{(m+k_0)^{\delta_1}} \geq \frac{1}{2(1-\delta_1)}(k+k_0)^{1-\delta_1} - \frac{1}{2(1-\delta_1)}\left(\frac{k}{2} + k_0\right)^{1-\delta_1}$$

$$\geq \frac{1}{2^{1+\delta_1}(1-\delta_1)}(k+k_0)^{1-\delta_1} \left( 2^{1-\delta_1} - 1 - \frac{(1-\delta_1)k_0}{k+k_0} \right) \geq \frac{\delta_1}{4(1-\delta_1)}(k+k_0)^{1-\delta_1}$$

Following up with (43), we have,

$$\begin{aligned} z(k+1) &\leq \exp\left(-\sum_{l=0}^k -\frac{a_1}{(l+k_0)^{\delta_1}}\right) z(0) + \frac{a_2 2^{\delta_1}}{a_1 (k+k_0)^{\delta_1}} + \frac{a_2}{k_0^{\delta_1}} \exp\left(-\frac{a_1 \delta_1}{4(1-\delta_1)}(k+k_0)^{1-\delta_1}\right) \frac{1}{2\delta_1-1} \\ &\leq \exp\left(-\frac{a_1 \delta_1 (k+k_0)^{1-\delta_1}}{4(1-\delta_1)}\right) \left( z(0) + \frac{a_2}{k_0^{\delta_1} (2\delta_1-1)} \right) + \frac{a_2 2^{\delta_1}}{a_1 (k+k_0)^{\delta_1}}. \end{aligned} \quad (44)$$

For  $\delta = 2/3$ , we have,

$$z(k+1) \leq \exp\left(-\frac{a_1 (k+k_0)^{1/3}}{2}\right) \left( z(0) + \frac{3a_2}{k_0^{2/3}} \right) + \frac{a_2 2^{2/3}}{a_1 (k+k_0)^{2/3}}.$$

□

*Proof of Theorem 3.4 (1).* Now using the result in Lemma B.1 we can characterize the convergence of the sequence of expected errors  $\mathbb{E} [\|\nabla f(\mathbf{x}_t) - \mathbf{d}_t\|^2]$  to zero. To be more precise, using the result in Lemma 3.2 and setting  $\gamma_t = 2/(t+8)$ ,  $\rho_t = 4/d^{1/3}(t+8)^{2/3}$  and  $c_t = 2/\sqrt{M(\mu)}(t+8)^{1/3}$  for any  $\epsilon > 0$  to obtain

$$\begin{aligned} &\mathbb{E} [\|\nabla f(\mathbf{x}_t) - \mathbf{d}_t\|^2] \\ &\leq \left(1 - \frac{2}{d^{1/3}(t+8)^{2/3}}\right) \mathbb{E} [\|\nabla F(\mathbf{x}_{t-1}) - \mathbf{d}_{t-1}\|^2] \\ &\quad + \frac{32d^{-1/3}\sigma^2 + 64d^{-1/3}L_1^2 + 128d^{2/3}L_1^2 + 2L^2R^2d^{2/3} + 416d^{2/3}L^2}{(t+8)^{4/3}}. \end{aligned} \quad (45)$$

According to the result in Lemma B.1, the inequality in (45) implies that

$$\mathbb{E} [\|\nabla f(\mathbf{x}_t) - \mathbf{d}_t\|^2] \leq \bar{Q} + \frac{Q}{(t+8)^{2/3}} \leq \frac{2Q}{(t+8)^{2/3}}, \quad (46)$$

where  $Q = 32d^{-1/3}\sigma^2 + 64d^{-1/3}L_1^2 + 128d^{2/3}L_1^2 + 2L^2R^2d^{2/3} + 416d^{2/3}L^2$ , where  $\bar{Q}$  is a function of  $\mathbb{E} [\|\nabla f(\mathbf{x}_0) - \mathbf{d}_0\|^2]$  and decays exponentially. Now we proceed by replacing the term  $\mathbb{E} [\|\nabla f(\mathbf{x}_t) - \mathbf{d}_t\|^2]$  in (42) by its upper bound in (46) and  $\gamma_{t+1}$  by  $2/(t+9)$  to write

$$\begin{aligned} \mathbb{E} [f(\mathbf{x}_{t+1}) - f(\mathbf{x}^*)] &\leq \left(1 - \frac{2}{t+9}\right) \mathbb{E} [(f(\mathbf{x}_t) - f(\mathbf{x}^*))] \\ &\quad + \frac{R\sqrt{Q}}{(t+9)^{4/3}} + \frac{2LR^2}{(t+9)^2}. \end{aligned} \quad (47)$$

Note that we can write  $(t+9)^2 = (t+9)^{4/3}(t+9)^{2/3} \geq (t+9)^{4/3}9^{2/3} \geq 4(t+9)^{4/3}$ . Therefore,

$$\begin{aligned} \mathbb{E} [f(\mathbf{x}_{t+1}) - f(\mathbf{x}^*)] &\leq \left(1 - \frac{2}{t+9}\right) \mathbb{E} [(f(\mathbf{x}_t) - f(\mathbf{x}^*))] \\ &\quad + \frac{2R\sqrt{Q} + LR^2/2}{(t+9)^{4/3}}. \end{aligned} \quad (48)$$

We use induction to prove for  $t \geq 0$ ,

$$\mathbb{E} [f(\mathbf{x}_t) - f(\mathbf{x}^*)] \leq \frac{Q'}{(t+9)^{1/3}},$$

where  $Q' = \max\{9^{1/3}(f(\mathbf{x}_0) - f(\mathbf{x}^*)), 2R\sqrt{2Q} + LR^2/2\}$ . For  $t = 0$ , we have that  $\mathbb{E} [f(\mathbf{x}_t) - f(\mathbf{x}^*)] \leq \frac{Q'}{9^{1/3}}$ , which is true follows from the definition of  $Q'$ . Assume for the induction hypothesis holds for  $t = k$ . Then, for  $t = k+1$ , we have,

$$\mathbb{E} [f(\mathbf{x}_{k+1}) - f(\mathbf{x}^*)] \leq \left(1 - \frac{2}{k+9}\right) \mathbb{E} [(f(\mathbf{x}_k) - f(\mathbf{x}^*))]$$

$$\begin{aligned}
 & + \frac{2R\sqrt{2Q} + LD^2/2}{(k+9)^{4/3}} \\
 & \leq \left(1 - \frac{2}{k+9}\right) \frac{Q'}{(t+9)^{1/3}} + \frac{Q'}{(t+9)^{4/3}} \leq \frac{Q'}{(t+10)^{1/3}}.
 \end{aligned}$$

Thus, for  $t \geq 0$  from Lemma B.1 we have that,

$$\mathbb{E}[f(\mathbf{x}_t) - f(\mathbf{x}^*)] \leq \frac{Q'}{(t+9)^{1/3}} = O\left(\frac{d^{1/3}}{(t+9)^{1/3}}\right). \quad (49)$$

where  $Q' = \max\{2(f(\mathbf{x}_0) - f(\mathbf{x}^*)), 2R\sqrt{2Q} + LR^2/2\}$ .  $\square$

*Proof of Theorem 3.5(1).* Then, we have,

$$\begin{aligned}
 F(\mathbf{x}_{t+1}) & \leq F(\mathbf{x}_t) + \gamma_t \langle \mathbf{g}(\mathbf{x}_t), \mathbf{v}_t - \mathbf{x}_t \rangle \\
 & + \gamma_t \langle \nabla F(\mathbf{x}_t) - \mathbf{g}(\mathbf{x}_t), \mathbf{v}_t - \mathbf{x}_t \rangle + \frac{LR^2\gamma_t^2}{2} \\
 & \Rightarrow F(\mathbf{x}_{t+1}) \leq F(\mathbf{x}_t) + \gamma_t \langle \mathbf{g}(\mathbf{x}_t), \underset{\mathbf{v} \in \mathcal{C}}{\operatorname{argmin}} \langle \mathbf{v}, \nabla F(\mathbf{x}_t) \rangle - \mathbf{x}_t \rangle \\
 & + \gamma_t \langle \nabla F(\mathbf{x}_t) - \mathbf{g}(\mathbf{x}_t), \mathbf{v}_t - \mathbf{x}_t \rangle + \frac{LR^2\gamma_t^2}{2} \\
 & \Rightarrow F(\mathbf{x}_{t+1}) \leq F(\mathbf{x}_t) + \gamma_t \langle \nabla F(\mathbf{x}_t), \underset{\mathbf{v} \in \mathcal{C}}{\operatorname{argmin}} \langle \mathbf{v}, \nabla F(\mathbf{x}_t) \rangle - \mathbf{x}_t \rangle \\
 & + \gamma_t \langle \nabla F(\mathbf{x}_t) - \mathbf{g}(\mathbf{x}_t), \mathbf{v}_t - \underset{\mathbf{v} \in \mathcal{C}}{\operatorname{argmin}} \langle \mathbf{v}, \nabla F(\mathbf{x}_t) \rangle \rangle + \frac{LR^2\gamma_t^2}{2} \\
 & \Rightarrow F(\mathbf{x}_{t+1}) \leq F(\mathbf{x}_t) - \gamma_t \mathcal{G}(\mathbf{x}_t) \\
 & + \gamma_t \langle \nabla F(\mathbf{x}_t) - \mathbf{g}(\mathbf{x}_t), \mathbf{v}_t - \underset{\mathbf{v} \in \mathcal{C}}{\operatorname{argmin}} \langle \mathbf{v}, \nabla F(\mathbf{x}_t) \rangle \rangle + \frac{LR^2\gamma_t^2}{2} \\
 & \Rightarrow \gamma_t \mathbb{E}[\mathcal{G}(\mathbf{x}_t)] \leq \mathbb{E}[F(\mathbf{x}_t) - F(\mathbf{x}_{t+1})] + \gamma_t R \frac{\sqrt{2Q}}{(t+8)^{1/3}} + \frac{LR^2\gamma_t^2}{2} + \\
 & \Rightarrow \mathbb{E}[\mathcal{G}(\mathbf{x}_t)] \leq \mathbb{E}\left[\frac{t+7}{2}F(\mathbf{x}_t) - \frac{t+8}{2}F(\mathbf{x}_{t+1}) + \frac{1}{2}F(\mathbf{x}_t)\right] + R \frac{\sqrt{2Q}}{(t+8)^{1/3}} + \frac{LR^2\gamma_t}{2} \\
 & \Rightarrow \sum_{t=0}^{T-1} \mathbb{E}[\mathcal{G}(\mathbf{x}_t)] \leq \mathbb{E}\left[\frac{7}{2}F(\mathbf{x}_0) - \frac{T+7}{2}F(\mathbf{x}_T) + \sum_{t=0}^{T-1} \left(\frac{1}{2}F(\mathbf{x}_t)\right) + R \frac{\sqrt{2Q}}{(t+8)^{1/3}} + \frac{LR^2\gamma_t}{2}\right] \\
 & \Rightarrow \sum_{t=0}^{T-1} \mathbb{E}[\mathcal{G}(\mathbf{x}_t)] \leq \mathbb{E}\left[\frac{7}{2}F(\mathbf{x}_0) - \frac{7}{2}F(\mathbf{x}^*)\right] + \sum_{t=0}^{T-1} \left(\frac{1}{2}(F(\mathbf{x}_t) - F(\mathbf{x}^*)) + R \frac{\sqrt{2Q}}{(t+8)^{1/3}} + \frac{LR^2\gamma_t}{2}\right) \\
 & \Rightarrow \sum_{t=0}^{T-1} \mathbb{E}[\mathcal{G}(\mathbf{x}_t)] \leq \frac{7}{2}F(\mathbf{x}_0) - \frac{7}{2}F(\mathbf{x}^*) + \sum_{t=0}^{T-1} \left(\frac{Q' + R\sqrt{2Q}}{2(t+8)^{1/3}} + \frac{LR^2}{(t+8)}\right) \\
 & \Rightarrow T \mathbb{E}\left[\min_{t=0, \dots, T-1} \mathcal{G}(\mathbf{x}_t)\right] \leq \frac{7}{2}F(\mathbf{x}_0) - \frac{7}{2}F(\mathbf{x}^*) + LR^2 \ln(T+7) + \frac{Q' + R\sqrt{2Q}}{2}(T+7)^{2/3} \\
 & \Rightarrow \mathbb{E}\left[\min_{t=0, \dots, T-1} \mathcal{G}(\mathbf{x}_t)\right] \leq \frac{7(F(\mathbf{x}_0) - F(\mathbf{x}^*))}{2T} + \frac{LR^2 \ln(T+7)}{T} + \frac{Q' + R\sqrt{2Q}}{2T}(T+7)^{2/3}. \quad (50)
 \end{aligned}$$

$\square$

## C Proofs for Improvised RDSA

*Proof of Lemma 3.2(2).* Following as in the proof of RDSA, we have,

$$\begin{aligned}
 & \mathbb{E}[\|\nabla f(\mathbf{x}_t) - \mathbf{d}_t\|^2 \mid \mathcal{F}_t] \\
 & \leq \rho_t^2 \mathbb{E}[\|\nabla f(\mathbf{x}_t) - g(\mathbf{x}_t; \mathbf{y}_t, \mathbf{z}_t)\|^2 \mid \mathcal{F}_t] \\
 & + (1 - \rho_t)^2 \|\nabla f(\mathbf{x}_t) - \nabla f(\mathbf{x}_{t-1})\|^2 \\
 & + (1 - \rho_t)^2 \|\nabla f(\mathbf{x}_{t-1}) - \mathbf{d}_{t-1}\|^2 \\
 & + (1 - \rho_t)^2 \beta_t \|\nabla f(\mathbf{x}_{t-1}) - \mathbf{d}_{t-1}\|^2
 \end{aligned}$$

$$\begin{aligned}
 & + \frac{(1 - \rho_t)^2}{\beta_t} \|\nabla f(\mathbf{x}_t) - \nabla f(\mathbf{x}_{t-1})\|^2 \\
 & + 2\rho_t(1 - \rho_t) \frac{c_t^2}{m^2} \|L\mathbf{v}(\mathbf{x}, c_t)\|^2 + \rho_t(1 - \rho_t) \|\nabla f(\mathbf{x}_t) - \nabla f(\mathbf{x}_{t-1})\|^2 \\
 & + \rho_t(1 - \rho_t) \|\nabla f(\mathbf{x}_{t-1}) - \mathbf{d}_{t-1}\|^2 \\
 \Rightarrow & \mathbb{E} [\|\nabla f(\mathbf{x}_t) - \mathbf{d}_t\|^2] \leq 2\rho_t^2 \sigma^2 + 4\rho_t^2 \mathbb{E} [\|\nabla F(\mathbf{x}_t, \mathbf{y}_t)\|^2] \\
 & + 4\rho_t^2 \mathbb{E} [\|g(\mathbf{x}_t; \mathbf{y}_t, \mathbf{z}_t)\|^2] \\
 & + \left(1 - \rho_t + \frac{(1 - \rho_t)^2}{\beta_t}\right) \mathbb{E} [\|\nabla f(\mathbf{x}_t) - \nabla f(\mathbf{x}_{t-1})\|^2] \\
 & + (1 - \rho_t + (1 - \rho_t)^2 \beta_t) \mathbb{E} [\|\nabla f(\mathbf{x}_{t-1}) - \mathbf{d}_{t-1}\|^2] \\
 & + \frac{\rho_t}{2} (1 - \rho_t) c_t^2 L^2 M(\mu) \\
 \leq & 2\rho_t^2 \sigma^2 + 4\rho_t^2 L_1^2 + 8\rho_t^2 \left(1 + \frac{s(d)}{m}\right) L_1^2 + \left(\frac{1+m}{2m}\right) \rho_t^2 c_t^2 L^2 M(\mu) \\
 & + \left(1 - \rho_t + \frac{(1 - \rho_t)^2}{\beta_t}\right) \mathbb{E} [\|\nabla f(\mathbf{x}_t) - \nabla f(\mathbf{x}_{t-1})\|^2] \\
 & + (1 - \rho_t + (1 - \rho_t)^2 \beta_t) \mathbb{E} [\|\nabla f(\mathbf{x}_{t-1}) - \mathbf{d}_{t-1}\|^2] \\
 & + \frac{\rho_t}{2m^2} c_t^2 L^2 M(\mu), \tag{51}
 \end{aligned}$$

where we used the gradient approximation bounds as stated in (15) and used Young's inequality to substitute the inner products and in particular substituted  $2\langle \nabla f(\mathbf{x}_t) - \nabla f(\mathbf{x}_{t-1}), \nabla f(\mathbf{x}_{t-1}) - \mathbf{d}_{t-1} \rangle$  by the upper bound  $\beta_t \|\nabla f(\mathbf{x}_{t-1}) - \mathbf{d}_{t-1}\|^2 + (1/\beta_t) \|\nabla f(\mathbf{x}_t) - \nabla f(\mathbf{x}_{t-1})\|^2$  where  $\beta_t > 0$  is a free parameter.

According to Assumption A4, the norm  $\|\nabla f(\mathbf{x}_t) - \nabla f(\mathbf{x}_{t-1})\|$  is bounded above by  $L\|\mathbf{x}_t - \mathbf{x}_{t-1}\|$ . In addition, the condition in Assumption A1 implies that  $L\|\mathbf{x}_t - \mathbf{x}_{t-1}\| = L\gamma_t \|\mathbf{v}_t - \mathbf{x}_t\| \leq \gamma_t LR$ . Therefore, we can replace  $\|\nabla f(\mathbf{x}_t) - \nabla f(\mathbf{x}_{t-1})\|$  by its upper bound  $\gamma_t LR$  and since we assume that  $\rho_t \leq 1$  we can replace all the terms  $(1 - \rho_t)^2$ . Furthermore, using  $\beta_t := \rho_t/2$  we have,

$$\begin{aligned}
 & \mathbb{E} [\|\nabla f(\mathbf{x}_t) - \mathbf{d}_t\|^2] \\
 & \leq 2\rho_t^2 \sigma^2 + 4\rho_t^2 L_1^2 + 8\rho_t^2 \left(1 + \frac{s(d)}{m}\right) L_1^2 + \frac{\rho_t}{2m^2} c_t^2 L^2 M(\mu) \\
 & + \gamma_t^2 (1 - \rho_t) \left(1 + \frac{2}{\rho_t}\right) L^2 R^2 + \left(\frac{1+m}{2m}\right) \rho_t^2 c_t^2 L^2 M(\mu) \\
 & + (1 - \rho_t) \left(1 + \frac{\rho_t}{2}\right) \mathbb{E} [\|\nabla f(\mathbf{x}_{t-1}) - \mathbf{d}_{t-1}\|^2]. \tag{52}
 \end{aligned}$$

Now using the inequalities  $(1 - \rho_t)(1 + (2/\rho_t)) \leq (2/\rho_t)$  and  $(1 - \rho_t)(1 + (\rho_t/2)) \leq (1 - \rho_t/2)$  we obtain

$$\begin{aligned}
 & \mathbb{E} [\|\nabla f(\mathbf{x}_t) - \mathbf{d}_t\|^2] \leq 2\rho_t^2 \sigma^2 + 4\rho_t^2 L_1^2 + 8\rho_t^2 \left(1 + \frac{s(d)}{m}\right) L_1^2 \\
 & + \left(\frac{1+m}{2m}\right) \rho_t^2 c_t^2 L^2 M(\mu) + \frac{2L^2 R^2 \gamma_t^2}{\rho_t} + \frac{\rho_t}{2m^2} c_t^2 L^2 M(\mu) \\
 & + \left(1 - \frac{\rho_t}{2}\right) \mathbb{E} [\|\nabla f(\mathbf{x}_{t-1}) - \mathbf{d}_{t-1}\|^2]. \tag{53}
 \end{aligned}$$

□

*Proof of Theorem 3.4(2).* Now using the result in Lemma B.1 we can characterize the convergence of the sequence of expected errors  $\mathbb{E} [\|\nabla f(\mathbf{x}_t) - \mathbf{d}_t\|^2]$  to zero. To be more precise, using the result in Lemma 3.2 and setting  $\gamma_t = 2/(t+8)$ ,  $\rho_t = 4/(1 + \frac{d}{m})^{1/3} (t+8)^{2/3}$  and  $c_t = 2\sqrt{m}/\sqrt{M(\mu)}(t+8)^{1/3}$ , we have,

$$\begin{aligned}
 & \mathbb{E} [\|\nabla f(\mathbf{x}_t) - \mathbf{d}_t\|^2] \\
 & \leq \left(1 - \frac{2}{\left(1 + \frac{d}{m}\right)^{1/3} (t+8)^{2/3}}\right) \mathbb{E} [\|\nabla F(\mathbf{x}_{t-1}) - \mathbf{d}_{t-1}\|^2] \\
 & + \frac{32 \left(1 + \frac{d}{m}\right)^{-1/3} \sigma^2 + 64L_1^2 \left(1 + \frac{d}{m}\right)^{-1/3} + 128 \left(1 + \frac{d}{m}\right)^{2/3} L_1^2}{(t+8)^{4/3}}
 \end{aligned}$$

$$+ \frac{2L^2R^2 \left(1 + \frac{d}{m}\right)^{2/3} + 416 \left(1 + \frac{d}{m}\right)^{2/3} L^2}{(t+8)^{4/3}}. \quad (54)$$

According to the result in Lemma B.1, the inequality in (45) implies that

$$\mathbb{E} [\|\nabla f(\mathbf{x}_t) - \mathbf{d}_t\|^2] \leq \bar{Q}_{ir} + \frac{Q_{ir}}{(t+8)^{2/3}} \leq \frac{Q_{ir}}{(t+8)^{2/3}}, \quad (55)$$

where  $Q_{ir} = 32 \left(1 + \frac{d}{m}\right)^{-1/3} \sigma^2 + 128 \left(1 + \frac{d}{m}\right)^{2/3} L_1^2 + 64 \left(1 + \frac{d}{m}\right)^{-1/3} L_1^2 + 2L^2R^2 \left(1 + \frac{d}{m}\right)^{2/3} + 416 \left(1 + \frac{d}{m}\right)^{2/3} L^2$  and  $\bar{Q}_{ir}$  is a function of  $\mathbb{E} [\|\nabla f(\mathbf{x}_0) - \mathbf{d}_0\|^2]$  and decays exponentially. Now we proceed by replacing the term  $\mathbb{E} [\|\nabla f(\mathbf{x}_t) - \mathbf{d}_t\|^2]$  in (42) by its upper bound in (55) and  $\gamma_{t+1}$  by  $2/(t+9)$  to write

$$\begin{aligned} \mathbb{E} [f(\mathbf{x}_{t+1}) - f(\mathbf{x}^*)] &\leq \left(1 - \frac{2}{t+9}\right) \mathbb{E} [(f(\mathbf{x}_t) - f(\mathbf{x}^*))] \\ &+ \frac{R\sqrt{2Q_{ir}}}{(t+9)^{4/3}} + \frac{2LR^2}{(t+9)^2}. \end{aligned} \quad (56)$$

Note that we can write  $(t+9)^2 = (t+9)^{4/3}(t+9)^{2/3} \geq (t+9)^{4/3}9^{2/3} \geq 4(t+9)^{4/3}$ . Therefore,

$$\begin{aligned} \mathbb{E} [f(\mathbf{x}_{t+1}) - f(\mathbf{x}^*)] &\leq \left(1 - \frac{2}{t+9}\right) \mathbb{E} [(f(\mathbf{x}_t) - f(\mathbf{x}^*))] \\ &+ \frac{2R\sqrt{Q} + LD^2/2}{(t+9)^{4/3}}. \end{aligned} \quad (57)$$

Following the induction steps as in (49), we have,

$$\mathbb{E} [f(\mathbf{x}_t) - f(\mathbf{x}^*)] \leq \frac{Q'_{ir}}{(t+8)^{1/3}} = O\left(\frac{(d/m)^{1/3}}{(t+9)^{1/3}}\right). \quad (58)$$

where  $Q'_{ir} = \max\{2(f(\mathbf{x}_0) - f(\mathbf{x}^*)), 2R\sqrt{2Q_{ir}} + LR^2/2\}$ .  $\square$

*Proof of Theorem 3.5(2).* Following as in (50), we have,

$$\begin{aligned} \gamma_t \mathbb{E} [\mathcal{G}(\mathbf{x}_t)] &\leq \mathbb{E} [F(\mathbf{x}_t) - F(\mathbf{x}_{t+1})] + \gamma_t R \frac{\sqrt{2Q_{ir}}}{(t+8)^{1/3}} + \frac{LR^2\gamma_t^2}{2} + \\ &\Rightarrow \mathbb{E} [\mathcal{G}(\mathbf{x}_t)] \leq \mathbb{E} \left[ \frac{t+7}{2} F(\mathbf{x}_t) - \frac{t+8}{2} F(\mathbf{x}_{t+1}) + \frac{1}{2} F(\mathbf{x}_t) \right] + R \frac{\sqrt{2Q_{ir}}}{(t+8)^{1/3}} + \frac{LR^2\gamma_t}{2} \\ &\Rightarrow \sum_{t=0}^{T-1} \mathbb{E} [\mathcal{G}(\mathbf{x}_t)] \leq \mathbb{E} \left[ \frac{7}{2} F(\mathbf{x}_0) - \frac{T+7}{2} F(\mathbf{x}_T) + \sum_{t=0}^{T-1} \left( \frac{1}{2} F(\mathbf{x}_t) \right) + R \frac{\sqrt{2Q_{ir}}}{(t+8)^{1/3}} + \frac{LR^2\gamma_t}{2} \right] \\ &\Rightarrow \sum_{t=0}^{T-1} \mathbb{E} [\mathcal{G}(\mathbf{x}_t)] \leq \mathbb{E} \left[ \frac{7}{2} F(\mathbf{x}_0) - \frac{7}{2} F(\mathbf{x}^*) \right] + \sum_{t=0}^{T-1} \left( \frac{1}{2} (F(\mathbf{x}_t) - F(\mathbf{x}^*)) + R \frac{\sqrt{2Q_{ir}}}{(t+8)^{1/3}} + \frac{LR^2\gamma_t}{2} \right) \\ &\Rightarrow \sum_{t=0}^{T-1} \mathbb{E} [\mathcal{G}(\mathbf{x}_t)] \leq \frac{7}{2} F(\mathbf{x}_0) - \frac{7}{2} F(\mathbf{x}^*) + \sum_{t=0}^{T-1} \left( \frac{Q'_{ir} + R\sqrt{2Q_{ir}}}{2(t+8)^{1/3}} + \frac{LR^2}{(t+8)} \right) \\ &\Rightarrow T \mathbb{E} \left[ \min_{t=0, \dots, T-1} \mathcal{G}(\mathbf{x}_t) \right] \leq \frac{7}{2} F(\mathbf{x}_0) - \frac{7}{2} F(\mathbf{x}^*) + LR^2 \ln(T+7) + \frac{Q'_{ir} + R\sqrt{2Q_{ir}}}{2} (T+7)^{2/3} \\ &\Rightarrow \mathbb{E} \left[ \min_{t=0, \dots, T-1} \mathcal{G}(\mathbf{x}_t) \right] \leq \frac{7(F(\mathbf{x}_0) - F(\mathbf{x}^*))}{2T} + \frac{LR^2 \ln(T+7)}{T} + \frac{Q'_{ir} + R\sqrt{2Q_{ir}}}{2T} (T+7)^{2/3} \end{aligned} \quad (59)$$

$\square$

## D Proofs for KWSA

*Proof of Lemma 3.2(3).* Following as in the proof of Lemma 3.2, we have,

$$\mathbb{E} [\|\nabla f(\mathbf{x}_t) - \mathbf{d}_t\|^2]$$



$$\begin{aligned}
 &\leq (1 - \rho_t)^2 \mathbb{E} [\|\nabla f(\mathbf{x}_t) - \nabla f(\mathbf{x}_{t-1})\|^2] \\
 &+ (1 - \rho_t)^2 \mathbb{E} [\|\nabla f(\mathbf{x}_{t-1}) - \mathbf{d}_{t-1}\|^2] \\
 &+ (1 - \rho_t)^2 \beta_t \mathbb{E} [\|\nabla f(\mathbf{x}_{t-1}) - \mathbf{d}_{t-1}\|^2] \\
 &+ \frac{(1 - \rho_t)^2}{\beta_t} \mathbb{E} [\|\nabla f(\mathbf{x}_t) - \nabla f(\mathbf{x}_{t-1})\|^2] \\
 &+ \frac{\rho_t}{2} (1 - \rho_t) c_t^2 L^2 d \\
 &+ \rho_t (1 - \rho_t) \mathbb{E} [\|\nabla f(\mathbf{x}_t) - \nabla f(\mathbf{x}_{t-1})\|^2] \\
 &+ \rho_t (1 - \rho_t) \mathbb{E} [\|\nabla f(\mathbf{x}_{t-1}) - \mathbf{d}_{t-1}\|^2] \\
 &\leq 2\rho_t^2 \sigma^2 + 2\rho_t^2 c_t^2 d L^2 \\
 &+ \left(1 - \rho_t + \frac{(1 - \rho_t)^2}{\beta_t}\right) \mathbb{E} [\|\nabla f(\mathbf{x}_t) - \nabla f(\mathbf{x}_{t-1})\|^2] \\
 &+ (1 - \rho_t + (1 - \rho_t)^2 \beta_t) \mathbb{E} [\|\nabla f(\mathbf{x}_{t-1}) - \mathbf{d}_{t-1}\|^2] \\
 &+ \frac{\rho_t}{2} (1 - \rho_t) c_t^2 L^2 d \\
 &\leq 2\rho_t^2 \sigma^2 + 2\rho_t c_t^2 d L^2 \\
 &+ \left(1 - \rho_t + \frac{(1 - \rho_t)^2}{\beta_t}\right) \mathbb{E} [\|\nabla f(\mathbf{x}_t) - \nabla f(\mathbf{x}_{t-1})\|^2] \\
 &+ (1 - \rho_t + (1 - \rho_t)^2 \beta_t) \mathbb{E} [\|\nabla f(\mathbf{x}_{t-1}) - \mathbf{d}_{t-1}\|^2], \tag{60}
 \end{aligned}$$

where we used the gradient approximation bounds as stated in (15) and used Young's inequality to substitute the inner products and in particular substituted  $2\langle \nabla f(\mathbf{x}_t) - \nabla f(\mathbf{x}_{t-1}), \nabla f(\mathbf{x}_{t-1}) - \mathbf{d}_{t-1} \rangle$  by the upper bound  $\beta_t \|\nabla f(\mathbf{x}_{t-1}) - \mathbf{d}_{t-1}\|^2 + (1/\beta_t) \|\nabla f(\mathbf{x}_t) - \nabla f(\mathbf{x}_{t-1})\|^2$  where  $\beta_t > 0$  is a free parameter.

According to Assumption A4, the norm  $\|\nabla f(\mathbf{x}_t) - \nabla f(\mathbf{x}_{t-1})\|$  is bounded above by  $L\|\mathbf{x}_t - \mathbf{x}_{t-1}\|$ . In addition, the condition in Assumption A1 implies that  $L\|\mathbf{x}_t - \mathbf{x}_{t-1}\| = L\gamma_t \|\mathbf{v}_t - \mathbf{x}_t\| \leq \gamma_t LR$ . Therefore, we can replace  $\|\nabla f(\mathbf{x}_t) - \nabla f(\mathbf{x}_{t-1})\|$  by its upper bound  $\gamma_t LR$  and since we assume that  $\rho_t \leq 1$  we can replace all the terms  $(1 - \rho_t)^2$ . Furthermore, using  $\beta_t := \rho_t/2$  we have,

$$\begin{aligned}
 &\mathbb{E} [\|\nabla f(\mathbf{x}_t) - \mathbf{d}_t\|^2] \\
 &\leq 2\rho_t^2 \sigma^2 + 2\rho_t c_t^2 d L^2 + \gamma_t^2 (1 - \rho_t) \left(1 + \frac{2}{\rho_t}\right) L^2 R^2 \\
 &+ (1 - \rho_t) \left(1 + \frac{\rho_t}{2}\right) \mathbb{E} [\|\nabla f(\mathbf{x}_{t-1}) - \mathbf{d}_{t-1}\|^2]. \tag{61}
 \end{aligned}$$

Now using the inequalities  $(1 - \rho_t)(1 + (2/\rho_t)) \leq (2/\rho_t)$  and  $(1 - \rho_t)(1 + (\rho_t/2)) \leq (1 - \rho_t/2)$  we obtain

$$\begin{aligned}
 &\mathbb{E} [\|\nabla f(\mathbf{x}_t) - \mathbf{d}_t\|^2] \leq 2\rho_t^2 \sigma^2 + 2\rho_t c_t^2 d L^2 + \frac{2L^2 R^2 \gamma_t^2}{\rho_t} \\
 &+ \left(1 - \frac{\rho_t}{2}\right) \mathbb{E} [\|\nabla f(\mathbf{x}_{t-1}) - \mathbf{d}_{t-1}\|^2]. \tag{62}
 \end{aligned}$$

□

*Proof of Theorem 3.4(3).* Now using the result in Lemma B.1 we can characterize the convergence of the sequence of expected errors  $\mathbb{E} [\|\nabla f(\mathbf{x}_t) - \mathbf{d}_t\|^2]$  to zero. To be more precise, using the result in Lemma 3.2 and setting  $\gamma_t = 2/(t+8)$ ,  $\rho_t = 4/(t+8)^{2/3}$  and  $c_t = 2/\sqrt{d}(t+8)^{1/3}$  for any  $\epsilon > 0$  to obtain

$$\begin{aligned}
 &\mathbb{E} [\|\nabla f(\mathbf{x}_t) - \mathbf{d}_t\|^2] \leq \\
 &\left(1 - \frac{2}{(t+8)^{2/3}}\right) \mathbb{E} [\|\nabla f(\mathbf{x}_{t-1}) - \mathbf{d}_{t-1}\|^2] \\
 &+ \frac{32\sigma^2 + 32L^2 + 2L^2 R^2}{(t+8)^{4/3}}. \tag{63}
 \end{aligned}$$

According to the result in Lemma B.1, the inequality in (45) implies that

$$\mathbb{E} [\|\nabla f(\mathbf{x}_t) - \mathbf{d}_t\|^2] \leq \frac{Q_{kw}}{(t+8)^{2/3}}, \tag{64}$$

where

$$Q = \max \{4\|\nabla f(\mathbf{x}_0) - \mathbf{d}_0\|^2, 32\sigma^2 + 32L^2 + 2L^2R^2\}$$

Now we proceed by replacing the term  $\mathbb{E}[\|\nabla f(\mathbf{x}_t) - \mathbf{d}_t\|^2]$  in (42) by its upper bound in (55) and  $\gamma_{t+1}$  by  $2/(t+9)$  to write

$$\begin{aligned} \mathbb{E}[f(\mathbf{x}_{t+1}) - f(\mathbf{x}^*)] &\leq \left(1 - \frac{2}{t+9}\right) \mathbb{E}[(f(\mathbf{x}_t) - f(\mathbf{x}^*))] \\ &\quad + \frac{R\sqrt{Q_{kw}}}{(t+9)^{4/3}} + \frac{2LR^2}{(t+9)^2}. \end{aligned} \quad (65)$$

Note that we can write  $(t+9)^2 = (t+9)^{4/3}(t+9)^{2/3} \geq (t+9)^{4/3}9^{2/3} \geq 4(t+9)^{4/3}$ . Therefore,

$$\begin{aligned} \mathbb{E}[f(\mathbf{x}_{t+1}) - f(\mathbf{x}^*)] &\leq \left(1 - \frac{2}{t+9}\right) \mathbb{E}[(f(\mathbf{x}_t) - f(\mathbf{x}^*))] \\ &\quad + \frac{2R\sqrt{Q_{kw}} + LD^2/2}{(t+9)^{4/3}}. \end{aligned} \quad (66)$$

Thus, for  $t \geq 0$  by induction we have,

$$\mathbb{E}[f(\mathbf{x}_t) - f(\mathbf{x}^*)] \leq \frac{Q'}{(t+9)^{1/3}} = O\left(\frac{d^0}{(t+9)^{1/3}}\right). \quad (67)$$

where  $Q' = \max\{2(f(\mathbf{x}_0) - f(\mathbf{x}^*)), 2R\sqrt{Q_{kw}} + LR^2/2\}$ .  $\square$

*Proof of Theorem 3.5(3).* Following as in (50), we have,

$$\begin{aligned} \gamma_t \mathbb{E}[\mathcal{G}(\mathbf{x}_t)] &\leq \mathbb{E}[F(\mathbf{x}_t) - F(\mathbf{x}_{t+1})] + \gamma_t R \frac{\sqrt{2Q_{kw}}}{(t+8)^{1/3}} + \frac{LR^2\gamma_t^2}{2} \\ &\Rightarrow \mathbb{E}[\mathcal{G}(\mathbf{x}_t)] \leq \mathbb{E}\left[\frac{t+7}{2}F(\mathbf{x}_t) - \frac{t+8}{2}F(\mathbf{x}_{t+1}) + \frac{1}{2}F(\mathbf{x}_t)\right] + R \frac{\sqrt{2Q_{kw}}}{(t+8)^{1/3}} + \frac{LR^2\gamma_t}{2} \\ &\Rightarrow \sum_{t=0}^{T-1} \mathbb{E}[\mathcal{G}(\mathbf{x}_t)] \leq \mathbb{E}\left[\frac{7}{2}F(\mathbf{x}_0) - \frac{T+7}{2}F(\mathbf{x}_T) + \sum_{t=0}^{T-1} \left(\frac{1}{2}F(\mathbf{x}_t)\right) + R \frac{\sqrt{2Q_{kw}}}{(t+8)^{1/3}} + \frac{LR^2\gamma_t}{2}\right] \\ &\Rightarrow \sum_{t=0}^{T-1} \mathbb{E}[\mathcal{G}(\mathbf{x}_t)] \leq \mathbb{E}\left[\frac{7}{2}F(\mathbf{x}_0) - \frac{7}{2}F(\mathbf{x}^*)\right] + \sum_{t=0}^{T-1} \left(\frac{1}{2}(F(\mathbf{x}_t) - F(\mathbf{x}^*)) + R \frac{\sqrt{2Q_{kw}}}{(t+8)^{1/3}} + \frac{LR^2\gamma_t}{2}\right) \\ &\Rightarrow \sum_{t=0}^{T-1} \mathbb{E}[\mathcal{G}(\mathbf{x}_t)] \leq \frac{7}{2}F(\mathbf{x}_0) - \frac{7}{2}F(\mathbf{x}^*) + \sum_{t=0}^{T-1} \left(\frac{Q'_{kw} + R\sqrt{2Q_{kw}}}{2(t+8)^{1/3}} + \frac{LR^2}{(t+8)}\right) \\ &\Rightarrow T \mathbb{E}\left[\min_{t=0, \dots, T-1} \mathcal{G}(\mathbf{x}_t)\right] \leq \frac{7}{2}F(\mathbf{x}_0) - \frac{7}{2}F(\mathbf{x}^*) + LR^2 \ln(T+7) + \frac{Q'_{kw} + R\sqrt{2Q_{kw}}}{2}(T+7)^{2/3} \\ &\Rightarrow \mathbb{E}\left[\min_{t=0, \dots, T-1} \mathcal{G}(\mathbf{x}_t)\right] \leq \frac{7(F(\mathbf{x}_0) - F(\mathbf{x}^*))}{2T} + \frac{LR^2 \ln(T+7)}{T} + \frac{Q'_{kw} + R\sqrt{2Q_{kw}}}{2T}(T+7)^{2/3} \end{aligned} \quad (68)$$

$\square$

## E Proofs for Non Convex Stochastic Frank Wolfe

*Proof of Theorem 3.6.* We reuse the following characterization derived earlier:

**Lemma E.1.** *Let Assumptions A3-A6 hold. Given the recursion in (12), we have that  $\|\nabla f(\mathbf{x}_t) - \mathbf{d}_t\|^2$  satisfies*

$$\begin{aligned} \mathbb{E}[\|\nabla f(\mathbf{x}_t) - \mathbf{d}_t\|^2] &\leq 2\rho_t^2\sigma^2 + 4\rho_t^2L_1^2 \\ &\quad + 8\rho_t^2\left(1 + \frac{s(d)}{m}\right)L_1^2 + \left(\frac{1+m}{2m}\right)\rho_t^2c_t^2L^2M(\mu) \\ &\quad + \frac{2L^2R^2\gamma_t^2}{\rho_t} + \frac{\rho_t}{2m^2}c_t^2L^2M(\mu) \\ &\quad + \left(1 - \frac{\rho_t}{2}\right)\mathbb{E}[\|\nabla f(\mathbf{x}_{t-1}) - \mathbf{d}_{t-1}\|^2]. \end{aligned} \quad (69)$$

Now using the result in Lemma B.1 we can characterize the convergence of the sequence of expected errors  $\mathbb{E} [\|\nabla f(\mathbf{x}_t) - \mathbf{d}_t\|^2]$  to zero. To be more precise, using the result in Lemma 3.2 and setting  $\gamma = T^{-3/4}$ ,  $\rho_t = 4 / \left(1 + \frac{d}{m}\right)^{1/3} (t+8)^{1/2}$  and  $c_t = 2\sqrt{m}/\sqrt{M(\mu)}(t+8)^{1/4}$  to obtain for all  $t = 0, \dots, T-1$ ,

$$\begin{aligned}
 & \mathbb{E} [\|\nabla f(\mathbf{x}_t) - \mathbf{d}_t\|^2] \\
 & \leq \left(1 - \frac{2}{\left(1 + \frac{d}{m}\right)^{1/3} (t+8)^{1/2}}\right) \mathbb{E} [\|\nabla F(\mathbf{x}_{t-1}) - \mathbf{d}_{t-1}\|^2] \\
 & \quad + \frac{32\sigma^2 + 64L_1^2 + 128 \left(1 + \frac{d}{m}\right)^{1/3} L_1^2}{(t+8)} \\
 & \quad + \frac{8L^2R^2 \left(1 + \frac{d}{m}\right)^{1/3} + 416L^2}{(t+8)}. \tag{70}
 \end{aligned}$$

Using Lemma B.1, we then have,

$$\mathbb{E} [\|\nabla f(\mathbf{x}_t) - \mathbf{d}_t\|^2] = O\left(\frac{(d/m)^{2/3}}{(t+9)^{1/2}}\right), \forall t = 0, \dots, T-1 \tag{71}$$

Finally, we have,

$$\begin{aligned}
 F(\mathbf{x}_{t+1}) & \leq F(\mathbf{x}_t) + \gamma_t \langle \mathbf{d}_t, \mathbf{v}_t - \mathbf{x}_t \rangle \\
 & \quad + \gamma \langle \nabla F(\mathbf{x}_t) - \mathbf{d}_t, \mathbf{v}_t - \mathbf{x}_t \rangle + \frac{LR^2\gamma^2}{2} \\
 & \leq F(\mathbf{x}_t) + \gamma \langle \mathbf{d}_t, \underset{\mathbf{v} \in \mathcal{C}}{\operatorname{argmin}} \langle \mathbf{v}, \nabla F(\mathbf{x}_t) \rangle - \mathbf{x}_t \rangle \\
 & \quad + \gamma \langle \nabla F(\mathbf{x}_t) - \mathbf{d}_t, \mathbf{v}_t - \mathbf{x}_t \rangle + \frac{LR^2\gamma^2}{2} \\
 & \leq F(\mathbf{x}_t) + \gamma \langle \nabla F(\mathbf{x}_t), \underset{\mathbf{v} \in \mathcal{C}}{\operatorname{argmin}} \langle \mathbf{v}, \nabla F(\mathbf{x}_t) \rangle - \mathbf{x}_t \rangle \\
 & \quad + \gamma \langle \nabla F(\mathbf{x}_t) - \mathbf{d}_t, \mathbf{v}_t - \underset{\mathbf{v} \in \mathcal{C}}{\operatorname{argmin}} \langle \mathbf{v}, \nabla F(\mathbf{x}_t) \rangle \rangle + \frac{LR^2\gamma^2}{2} \\
 & \leq F(\mathbf{x}_t) - \gamma \mathcal{G}(\mathbf{x}_t) + \frac{LR^2\gamma^2}{2} \\
 & \quad + \gamma \langle \nabla F(\mathbf{x}_t) - \mathbf{d}_t, \mathbf{v}_t - \underset{\mathbf{v} \in \mathcal{C}}{\operatorname{argmin}} \langle \mathbf{v}, \nabla F(\mathbf{x}_t) \rangle \rangle \\
 & \Rightarrow \gamma \mathbb{E} [\mathcal{G}(\mathbf{x}_t)] \leq \mathbb{E} [F(\mathbf{x}_t)] - \mathbb{E} [F(\mathbf{x}_{t+1})] \\
 & \quad + \gamma R \mathbb{E} [\|\nabla F(\mathbf{x}_t) - \mathbf{d}_t\|] + \frac{LR^2\gamma^2}{2} \\
 & \leq \mathbb{E} [F(\mathbf{x}_t)] - \mathbb{E} [F(\mathbf{x}_{t+1})] + \gamma_t R \sqrt{\mathbb{E} [\|\nabla F(\mathbf{x}_t) - \mathbf{d}_t\|^2]} + \frac{LR^2\gamma^2}{2} \\
 & \leq \mathbb{E} [F(\mathbf{x}_t)] - \mathbb{E} [F(\mathbf{x}_{t+1})] + Q_{nc} \gamma \rho_t^{1/2} R (d/m)^{1/3} + \frac{LR^2\gamma^2}{2} \\
 & \Rightarrow \mathbb{E} [\mathcal{G}_{min}] T \gamma \leq \mathbb{E} [F(\mathbf{x}_0)] - \mathbb{E} [F(\mathbf{x}_{t+1})] \\
 & \quad + Q_{nc} \gamma R (d/m)^{1/3} \sum_{t=0}^{T-1} \rho_t^{1/2} + \frac{LR^2 T \gamma^2}{2} \\
 & \Rightarrow \mathbb{E} [\mathcal{G}_{min}] \leq \frac{\mathbb{E} [F(\mathbf{x}_0)] - \mathbb{E} [F(\mathbf{x}^*)]}{T \gamma} \\
 & \quad + \gamma Q_{nc} R (d/m)^{1/3} \frac{\sum_{t=0}^{T-1} \rho_t^{1/2}}{T \gamma} + \frac{LR^2 T \gamma^2}{2 T \gamma} \\
 & \Rightarrow \mathbb{E} [\mathcal{G}_{min}] \leq \frac{\mathbb{E} [F(\mathbf{x}_0)] - \mathbb{E} [F(\mathbf{x}^*)]}{T^{1/4}} \\
 & \quad + \frac{Q_{nc} R d^{1/3}}{T^{1/4} m^{1/3}} + \frac{LR^2}{2T}, \tag{72}
 \end{aligned}$$

where  $\mathcal{G}_{min} = \min_{t=0, \dots, T-1} \mathcal{G}(\mathbf{x}_t)$ . □
